# Supplementary material for: Mitochondrial DNA Indicates Late Pleistocene Divergence of Populations of Heteronympha merope, an Emerging Model in Environmental Change Biology
Source: PLoS One. 2009 Nov 24;4(11):e7950. doi: 10.1371/journal.pone.0007950 (PMC2776993; doi:10.1371/journal.pone.0007950)
Supplement: Table S3 — Haplotype summary and Genbank accession numbers for all Heteronympha specimens used in this study. (0.08 MB XLS) [file pone.0007950.s007.xls]

## Sheet: Sheet1
Specimen ID	Gender	ND5		COI (mtD6-9)		COI (LCO/HCO)
		Haplotype	Genbank Accession	Haplotype	Genbank Accession	Haplotype	Genbank Accession
AR030706	F	Hp1	GQ922166	Hp1	GQ922189	NA
AR030707	F	Hp2	GQ922167	Hp2	GQ922190	NA
AR030708	F	Hp1	GQ922166	NA		NA
AR030709	F	Hp2	GQ922167	NA		NA
AR030710	F	Hp1	GQ922166	NA		NA
BR010902	M	H6	GQ922138	NA		NA
BR010903	M	H9	GQ922141	NA		NA
BR010904	M	H1	GQ922133	NA		NA
BR010905	M	H6	GQ922138	NA		NA
BR010906	M	H9	GQ922141	NA		NA
BR010907	M	H1	GQ922133	NA		NA
BR010908	M	H1	GQ922133	NA		NA
BR010909	M	H1	GQ922133	NA		NA
BR010910	M	H1	GQ922133	NA		NA
BR010911	M	H3	GQ922135	NA		NA
BR010912	M	H1	GQ922133	NA		NA
BR010913	M	H1	GQ922133	NA		NA
BR010914	M	H1	GQ922133	NA		NA
BR010915	M	H6	GQ922138	NA		NA
BR010916	M	H1	GQ922133	NA		NA
BR010917	M	H1	GQ922133	NA		NA
BR010918	M	H6	GQ922138	NA		NA
BR010919	M	H11	GQ922143	NA		NA
BR010920	M	H31	GQ922163	NA		NA
CG030701	F	H1	GQ922133	H1	GQ922175	NA
CG030702	F	H5	GQ922137	H1	GQ922175	NA
CG030703	F	H3	GQ922135	H2	GQ922176	H1	GQ922170
CG030704	F	H1	GQ922133	H1	GQ922175	H1	GQ922170
CG030705	F	H5	GQ922137	H1	GQ922175	H2	GQ922171
CG030706	F	H5	GQ922137	H1	GQ922175	H2	GQ922171
CG030707	F	H5	GQ922137	H1	GQ922175	NA
CG030708	F	H4	GQ922136	H5	GQ922179	H3	GQ922172
CG030709	F	H5	GQ922137	H1	GQ922175	H1	GQ922170
CG030710	F	H5	GQ922137	H1	GQ922175	H1	GQ922170
CG030711	F	H3	GQ922135	H1	GQ922175	H1	GQ922170
CG030712	F	H5	GQ922137	H1	GQ922175	H1	GQ922170
CG030713	F	H1	GQ922133	H1	GQ922175	H1	GQ922170
CG030714	F	H5	GQ922137	H1	GQ922175	H1	GQ922170
CG030715	F	H13	GQ922145	H1	GQ922175	H1	GQ922170
CG030804	F	H1	GQ922133	NA		NA
CG030807	F	H1	GQ922133	NA		NA
CG030898	F	H1	GQ922133	NA		NA
CG030899	F	H1	GQ922133	NA		NA
CO030701	F	H30	GQ922162	NA		NA
CO030702	F	H1	GQ922133	NA		NA
CO030703	F	H3	GQ922135	NA		NA
CO030704	F	H1	GQ922133	NA		NA
CO030705	F	H1	GQ922133	NA		NA
CO030706	F	H1	GQ922133	NA		NA
CO030707	F	H1	GQ922133	NA		NA
CO030708	F	H1	GQ922133	NA		NA
CO030709	F	H1	GQ922133	NA		NA
CO030710	F	H31	GQ922163	NA		NA
CO030711	F	H1	GQ922133	NA		NA
CO030712	F	H1	GQ922133	NA		NA
CO030713	F	H1	GQ922133	NA		NA
CO030714	F	H1	GQ922133	NA		NA
CO030715	F	H1	GQ922133	NA		NA
CO030716	F	H1	GQ922133	NA		NA
CO030717	F	H1	GQ922133	NA		NA
FI008801	M	H1	GQ922133	NA		NA
FI008802	M	H1	GQ922133	NA		NA
FI008803	M	H1	GQ922133	NA		NA
FI008804	M	H1	GQ922133	NA		NA
FI008805	M	H1	GQ922133	NA		NA
FI008806	M	H1	GQ922133	NA		NA
FI008807	F	H1	GQ922133	NA		NA
FI008808	M	H1	GQ922133	NA		NA
FI008810	M	H1	GQ922133	NA		NA
FI008812	M	H1	GQ922133	NA		NA
FI008814	M	H1	GQ922133	NA		NA
FI008815	M	H1	GQ922133	NA		NA
FI008816	M	H1	GQ922133	NA		NA
FI008817	M	H1	GQ922133	NA		NA
FI008818	M	H1	GQ922133	NA		NA
FI008821	M	H1	GQ922133	NA		NA
FI008824	M	H1	GQ922133	NA		NA
HB010801	M	H1	GQ922133	H1	GQ922175	H1	GQ922170
HB010802	M	H3	GQ922135	H11	GQ922185	NA
HB010803	M	H3	GQ922135	H1	GQ922175	H1	GQ922170
HB010804	M	H5	GQ922137	H10	GQ922184	NA
HB010805	M	H3	GQ922135	H1	GQ922175	H1	GQ922170
HB010806	M	H6	GQ922138	H1	GQ922175	H1	GQ922170
HB010807	M	H3	GQ922135	H1	GQ922175	H1	GQ922170
HB010808	M	H3	GQ922135	H1	GQ922175	H1	GQ922170
HB010811	M	H3	GQ922135	H1	GQ922175	H1	GQ922170
HB030804	F	H1	GQ922133	NA		NA
HB030805	F	H6	GQ922138	NA		NA
HB030806	F	H1	GQ922133	NA		NA
HB030807	F	H6	GQ922138	NA		NA
HB030808	F	H1	GQ922133	NA		NA
HB030809	F	H6	GQ922138	NA		NA
HB030810	F	H6	GQ922138	NA		NA
HB030812	F	H6	GQ922138	NA		NA
HB030814	F	H1	GQ922133	NA		NA
HB030815	F	H6	GQ922138	NA		NA
HB030816	F	H1	GQ922133	NA		NA
HB030817	F	H7	GQ922139	NA		NA
HB030818	F	H6	GQ922138	NA		NA
HB030820	F	H8	GQ922140	NA		NA
HB030821	F	H1	GQ922133	NA		NA
WA120701	M	WA1	GQ922164	WA1	GQ922188	NA
WA120702	M	WA2	GQ922165	WA1	GQ922188	NA
WA120703	M	WA1	GQ922164	WA1	GQ922188	NA
WA120704	M	WA1	GQ922164	WA1	GQ922188	NA
WA120705	M	WA1	GQ922164	NA		NA
KI010851	F	H1	GQ922133	NA		NA
KI010853	F	H1	GQ922133	NA		NA
KI010854	F	H11	GQ922143	NA		NA
KI010855	F	H1	GQ922133	NA		NA
KI010867	F	H1	GQ922133	NA		NA
KI010868	F	H1	GQ922133	NA		NA
KI010869	F	H1	GQ922133	NA		NA
KI010870	F	H1	GQ922133	NA		NA
KI010871	F	H1	GQ922133	NA		NA
KI010872	F	H1	GQ922133	NA		NA
KI010873	F	H1	GQ922133	NA		NA
KI010874	F	H1	GQ922133	NA		NA
KI010875	F	H1	GQ922133	NA		NA
KI010876	F	H1	GQ922133	NA		NA
KI010877	F	H1	GQ922133	NA		NA
KI120701	M	H1	GQ922133	NA		NA
KI120708	M	H1	GQ922133	NA		NA
KI120711	M	H1	GQ922133	NA		NA
KI120712	M	H1	GQ922133	NA		NA
KI120714	M	H1	GQ922133	NA		NA
KI120719	M	H1	GQ922133	NA		NA
KI120720	M	H1	GQ922133	NA		NA
KI120721	M	H1	GQ922133	NA		NA
KI120722	M	H1	GQ922133	NA		NA
KI120724	M	H1	GQ922133	NA		NA
KI120726	M	H1	GQ922133	NA		NA
KI120731	M	H1	GQ922133	NA		NA
KI120734	M	H1	GQ922133	NA		NA
KI120735	M	H1	GQ922133	NA		NA
KI120739	M	H1	GQ922133	NA		NA
LA030802	F	H1	GQ922133	NA		NA
LA030803	F	H6	GQ922138	NA		NA
LA030805	F	H16	GQ922148	NA		NA
LA030807	F	H3	GQ922135	NA		NA
LA030808	F	H6	GQ922138	NA		NA
LA030809	F	H6	GQ922138	NA		NA
LA030810	F	H6	GQ922138	NA		NA
LA030811	F	H1	GQ922133	NA		NA
LA030812	F	H1	GQ922133	NA		NA
LA030813	F	H1	GQ922133	NA		NA
LA030815	F	H17	GQ922149	NA		NA
LA030821	F	H6	GQ922138	NA		NA
LA030822	F	H6	GQ922138	NA		NA
LA030823	F	H6	GQ922138	NA		NA
LA030824	F	H1	GQ922133	NA		NA
LA030825	F	H6	GQ922138	NA		NA
LA030826	F	H3	GQ922135	NA		NA
LA030827	F	H18	GQ922150	NA		NA
LA030828	F	H1	GQ922133	NA		NA
LA030829	F	H3	GQ922135	NA		NA
LA030830	F	H6	GQ922138	NA		NA
LA030831	F	H1	GQ922133	NA		NA
LA030832	F	H6	GQ922138	NA		NA
LA030833	F	H9	GQ922141	NA		NA
LA030834	F	H6	GQ922138	NA		NA
LA030835	F	H1	GQ922133	NA		NA
LA030836	F	H1	GQ922133	NA		NA
LO010812	M	H3	GQ922135	H1	GQ922175	H1	GQ922170
LO010815	M	H1	GQ922133	H1	GQ922175	NA
LO010817	M	H14	GQ922146	H1	GQ922175	NA
LO010818	M	H1	GQ922133	H1	GQ922175	NA
LO010820	M	H1	GQ922133	NA		H1	GQ922170
LO010821	M	H1	GQ922133	H1	GQ922175	H1	GQ922170
LO010822	M	H3	GQ922135	NA		NA
LO010823	M	H1	GQ922133	H1	GQ922175	NA
LO010824	M	H1	GQ922133	H1	GQ922175	H1	GQ922170
LO010825	M	NA		H1	GQ922175	H1	GQ922170
LO010826	M	H6	GQ922138	NA		H1	GQ922170
LO010828	M	NA		H13	GQ922187	NA
LO010832	M	H3	GQ922135	NA		H1	GQ922170
LO010833	M	H15	GQ922147	NA		H1	GQ922170
LO010837	M	H6	GQ922138	H1	GQ922175	H1	GQ922170
MR040801	F	H3	GQ922135	NA		NA
MR040802	F	H3	GQ922135	NA		NA
MR040803	F	H3	GQ922135	NA		NA
MR040805	F	H1	GQ922133	NA		NA
MR040808	F	H1	GQ922133	NA		NA
MR040810	F	H3	GQ922135	NA		NA
MR040811	F	H1	GQ922133	NA		NA
MR040812	F	H1	GQ922133	NA		NA
MR040813	F	H1	GQ922133	NA		NA
MR040817	F	H24	GQ922156	NA		NA
MR040818	F	H1	GQ922133	NA		NA
MR040819	F	H1	GQ922133	NA		NA
MR040820	F	H1	GQ922133	NA		NA
MR110704	M	H3	GQ922135	NA		NA
MR110705	M	H1	GQ922133	NA		NA
MR110706	M	H25	GQ922157	NA		NA
MR110707	M	H3	GQ922135	NA		NA
MR110710	M	H3	GQ922135	NA		NA
MR110711	M	H26	GQ922158	NA		NA
MR110712	M	H3	GQ922135	NA		NA
MR110715	M	H3	GQ922135	NA		NA
MR110716	M	H1	GQ922133	NA		NA
MR110718	M	H3	GQ922135	NA		NA
MR110724	M	H1	GQ922133	NA		NA
MR110725	M	H24	GQ922156	NA		NA
MR110727	M	H24	GQ922156	NA		NA
MY030701	F	H3	GQ922135	H1	GQ922175	H1	GQ922170
MY030702	F	H1	GQ922133	H1	GQ922175	H1	GQ922170
MY030703	F	H1	GQ922133	H1	GQ922175	H1	GQ922170
MY030704	F	H19	GQ922151	H1	GQ922175	H1	GQ922170
MY030705	F	H3	GQ922135	H2	GQ922176	NA
MY030706	F	H1	GQ922133	H8	GQ922182	NA
MY030707	F	H1	GQ922133	H1	GQ922175	H1	GQ922170
MY030708	F	H1	GQ922133	H9	GQ922183	NA
MY030709	F	H1	GQ922133	H9	GQ922183	NA
MY030710	F	H3	GQ922135	H1	GQ922175	H1	GQ922170
MY030711	F	H3	GQ922135	NA		NA
MY030712	F	H3	GQ922135	NA		NA
MY030713	F	H4	GQ922136	NA		NA
MY030714	F	H1	GQ922133	NA		NA
MY030715	F	H1	GQ922133	NA		NA
MY030716	F	H1	GQ922133	NA		NA
MY030717	F	H1	GQ922133	NA		NA
MY030718	F	H1	GQ922133	NA		NA
MY030719	F	H11	GQ922143	NA		NA
MY030720	F	H19	GQ922151	NA		NA
MY030721	F	H1	GQ922133	NA		NA
MY030722	F	H1	GQ922133	NA		NA
SI040701	F	H2	GQ922134	H1	GQ922175	H1	GQ922170
SI040702	F	H1	GQ922133	H1	GQ922175	NA
SI040703	F	H1	GQ922133	H1	GQ922175	H1	GQ922170
SI040704	F	H1	GQ922133	H1	GQ922175	H1	GQ922170
SI040705	F	H3	GQ922135	H1	GQ922175	H1	GQ922170
SI040706	F	H1	GQ922133	H1	GQ922175	H1	GQ922170
SI040707	F	H1	GQ922133	H1	GQ922175	H1	GQ922170
SI040708	F	NA		H1	GQ922175	H1	GQ922170
SI040709	F	H1	GQ922133	H1	GQ922175	H2	GQ922171
SI040710	F	NA		H6	GQ922180	NA
SI040711	F	H1	GQ922133	H1	GQ922175	H2	GQ922171
SI040712	F	H1	GQ922133	H1	GQ922175	H1	GQ922170
SI040713	F	H3	GQ922135	H7	GQ922181	NA
SI040714	F	H1	GQ922133	H1	GQ922175	H1	GQ922170
SI040715	F	H4	GQ922136	H5	GQ922179	NA
SI040716	F	H1	GQ922133	H1	GQ922175	H1	GQ922170
SI040717	F	H1	GQ922133	H3	GQ922177	NA
SI040718	F	H1	GQ922133	H1	GQ922175	H1	GQ922170
SI040719	F	H1	GQ922133	H1	GQ922175	H1	GQ922170
SI040720	F	H1	GQ922133	H1	GQ922175	H4	GQ922173
SI040721	F	H1	GQ922133	H5	GQ922179	NA
SI040722	F	H1	GQ922133	H1	GQ922175	H1	GQ922170
SI040723	F	H3	GQ922135	H1	GQ922175	H1	GQ922170
SI040724	F	H4	GQ922136	H6	GQ922180	NA
SI040725	F	H1	GQ922133	H5	GQ922179	NA
SI040726	F	H1	GQ922133	H1	GQ922175	H2	GQ922171
SI040727	F	H1	GQ922133	NA		NA
SI040728	F	H2	GQ922134	NA		NA
SI040729	F	H1	GQ922133	NA		NA
SI040730	F	H1	GQ922133	NA		NA
SP010813	F	H6	GQ922138	H1	GQ922175	H1	GQ922170
SP010814	M	H1	GQ922133	H1	GQ922175	H1	GQ922170
SP010816	M	H6	GQ922138	H1	GQ922175	H1	GQ922170
SP010819	M	H1	GQ922133	NA		H1	GQ922170
SP010827	M	H6	GQ922138	H12	GQ922186	NA
SP010829	M	H3	GQ922135	H1	GQ922175	H1	GQ922170
SP010830	M	H1	GQ922133	H1	GQ922175	H1	GQ922170
SP010831	M	H9	GQ922141	H1	GQ922175	H1	GQ922170
SP010834	M	H1	GQ922133	H1	GQ922175	H1	GQ922170
SP010835	M	H6	GQ922138	H1	GQ922175	H1	GQ922170
SP010836	M	H6	GQ922138	H1	GQ922175	H1	GQ922170
ST040701	F	H1	GQ922133	H1	GQ922175	NA
ST040702	F	H1	GQ922133	NA		NA
ST040703	F	H1	GQ922133	H1	GQ922175	NA
ST040704	F	H11	GQ922143	H1	GQ922175	NA
ST040705	F	H21	GQ922153	H1	GQ922175	NA
ST040706	F	H1	GQ922133	H1	GQ922175	NA
ST040707	F	H1	GQ922133	H1	GQ922175	NA
ST040708	F	NA		H1	GQ922175	NA
ST040709	F	H1	GQ922133	H1	GQ922175	NA
ST040710	F	H3	GQ922135	H1	GQ922175	NA
ST040711	F	NA		H1	GQ922175	NA
ST040712	F	H1	GQ922133	NA		NA
ST040713	F	H3	GQ922135	H1	GQ922175	NA
ST040714	F	NA		H1	GQ922175	NA
ST040716	F	NA		H1	GQ922175	NA
ST040717	F	H27	GQ922159	H2	GQ922176	NA
ST040718	F	H3	GQ922135	H1	GQ922175	NA
ST040719	F	H21	GQ922153	H1	GQ922175	NA
ST040720	F	H28	GQ922160	H1	GQ922175	NA
ST040721	F	H3	GQ922135	H1	GQ922175	NA
ST040722	F	H3	GQ922135	NA		NA
ST040724	F	H1	GQ922133	NA		NA
ST040725	F	H21	GQ922153	H1	GQ922175	NA
ST110726	M	H1	GQ922133	H1	GQ922175	NA
ST110727	M	H29	GQ922161	H1	GQ922175	NA
ST110728	M	H3	GQ922135	NA		NA
ST110729	M	NA		H2	GQ922176	NA
ST110730	M	H1	GQ922133	NA		NA
TO030701	F	H1	GQ922133	H1	GQ922175	NA
TO030703	F	H22	GQ922154	H1	GQ922175	NA
TO030707	F	H3	GQ922135	NA		NA
TO030708	F	H1	GQ922133	H1	GQ922175	NA
TO030710	F	H1	GQ922133	H1	GQ922175	NA
TO030711	F	H1	GQ922133	NA		NA
TO030712	F	H3	GQ922135	H1	GQ922175	NA
TO030713	F	H1	GQ922133	H1	GQ922175	NA
TO030714	F	NA		H1	GQ922175	NA
TO030715	F	H23	GQ922155	NA		NA
TO030716	F	H1	GQ922133	H1	GQ922175	NA
TO030717	F	H1	GQ922133	H2	GQ922176	NA
TO030718	F	H4	GQ922136	H1	GQ922175	NA
TO030719	F	H1	GQ922133	NA		NA
TO030720	F	NA		H1	GQ922175	NA
TO030721	F	H1	GQ922133	H2	GQ922176	NA
TO030722	F	H4	GQ922136	H1	GQ922175	NA
TO030723	F	H1	GQ922133	H1	GQ922175	NA
TO030724	F	H1	GQ922133	H1	GQ922175	NA
TO030725	F	H1	GQ922133	H1	GQ922175	NA
TO030827	F	H3	GQ922135	NA		NA
TO030828	F	H1	GQ922133	NA		NA
TO030829	F	H1	GQ922133	NA		NA
TO030830	F	H1	GQ922133	NA		NA
TO030831	F	H1	GQ922133	NA		NA
VI030705	F	H1	GQ922133	H1	GQ922175	NA
VI030706	F	H1	GQ922133	H1	GQ922175	NA
VI030707	F	H1	GQ922133	H1	GQ922175	H1	GQ922170
VI030708	F	H1	GQ922133	H1	GQ922175	NA
VI030709	F	H1	GQ922133	H1	GQ922175	NA
VI030710	F	H3	GQ922135	H1	GQ922175	H1	GQ922170
VI030711	F	H1	GQ922133	H1	GQ922175	H1	GQ922170
VI030712	F	NA		H1	GQ922175	NA
VI030713	F	H4	GQ922136	H5	GQ922179	NA
VI030714	F	H1	GQ922133	H1	GQ922175	NA
WB040701	F	H1	GQ922133	NA		H1	GQ922170
WB040702	F	H1	GQ922133	H1	GQ922175	H1	GQ922170
WB040703	F	H3	GQ922135	H2	GQ922176	NA
WB040704	F	H20	GQ922152	H1	GQ922175	H1	GQ922170
WB040705	F	H3	GQ922135	H2	GQ922176	NA
WB040706	F	H6	GQ922138	H1	GQ922175	H1	GQ922170
WB040707	F	H1	GQ922133	H1	GQ922175	H1	GQ922170
WB040708	F	H1	GQ922133	H1	GQ922175	H1	GQ922170
WB040709	F	NA		H1	GQ922175	NA
WB040710	F	H1	GQ922133	H1	GQ922175	H1	GQ922170
WB040711	F	H1	GQ922133	NA		NA
WB040712	F	H1	GQ922133	NA		NA
WB040713	F	H1	GQ922133	NA		NA
WB040714	F	H1	GQ922133	NA		NA
WB040716	F	H3	GQ922135	NA		NA
WB040717	F	H1	GQ922133	NA		NA
WB040718	F	H1	GQ922133	NA		NA
WB040720	F	H3	GQ922135	NA		NA
WB040721	F	H1	GQ922133	NA		NA
WB040722	F	H1	GQ922133	NA		NA
WB040723	F	H21	GQ922153	NA		NA
WB040724	F	H1	GQ922133	NA		NA
WJ030701	F	H1	GQ922133	NA		NA
WJ030702	F	H1	GQ922133	NA		NA
WJ030703	F	H1	GQ922133	NA		NA
WJ030704	F	H1	GQ922133	NA		NA
WJ030705	F	H13	GQ922145	NA		NA
WJ030706	F	H1	GQ922133	NA		NA
WJ030707	F	H1	GQ922133	NA		NA
WJ030708	F	H1	GQ922133	NA		NA
WJ030709	F	H1	GQ922133	NA		NA
WJ030710	F	H1	GQ922133	NA		NA
WP040801	F	H1	GQ922133	NA		NA
WP040803	F	H3	GQ922135	NA		NA
WP040804	F	H1	GQ922133	NA		NA
WP040805	F	H3	GQ922135	NA		NA
WP040806	F	H3	GQ922135	NA		NA
WP040807	F	H10	GQ922142	NA		NA
WP040808	F	H1	GQ922133	NA		NA
WP040809	F	H3	GQ922135	NA		NA
WP040810	F	H1	GQ922133	NA		NA
WP040812	F	H1	GQ922133	NA		NA
WP040813	F	H1	GQ922133	NA		NA
WP040898	F	H1	GQ922133	NA		NA
WP040899	F	H1	GQ922133	NA		NA
WP110701	M	H3	GQ922135	H2	GQ922176	NA
WP110702	M	H3	GQ922135	H1	GQ922175	NA
WP110703	M	H3	GQ922135	H2	GQ922176	NA
WP110704	M	H1	GQ922133	H1	GQ922175	H1	GQ922170
WP110705	M	H3	GQ922135	H2	GQ922176	NA
WP110706	M	H1	GQ922133	H4	GQ922178	NA
WP110707	M	H1	GQ922133	H1	GQ922175	H5	GQ922174
WP110708	M	H1	GQ922133	H1	GQ922175	H1	GQ922170
WP110709	M	H3	GQ922135	H1	GQ922175	H1	GQ922170
WP110710	M	H10	GQ922142	H1	GQ922175	NA
WP110711	M	H1	GQ922133	NA		H1	GQ922170
WP110712	M	H10	GQ922142	H1	GQ922175	H1	GQ922170
WP110713	M	H3	GQ922135	H2	GQ922176	NA
WP110714	M	H1	GQ922133	H1	GQ922175	H1	GQ922170
WP110715	M	H3	GQ922135	H1	GQ922175	NA
WP110716	M	H10	GQ922142	H1	GQ922175	NA
WP110717	M	H3	GQ922135	H2	GQ922176	NA
WP110718	M	H3	GQ922135	NA		NA
WP110719	M	H1	GQ922133	H1	GQ922175	H1	GQ922170
WP110720	M	H10	GQ922142	H1	GQ922175	H1	GQ922170
WP110721	M	H1	GQ922133	H1	GQ922175	H1	GQ922170
WP110722	M	H1	GQ922133	H1	GQ922175	H1	GQ922170
WP110723	M	H1	GQ922133	H1	GQ922175	H1	GQ922170
WP110724	M	H1	GQ922133	H1	GQ922175	H1	GQ922170
WP110725	M	H1	GQ922133	H1	GQ922175	H1	GQ922170
WP110726	M	H11	GQ922143	H1	GQ922175	H1	GQ922170
WP110727	M	H1	GQ922133	H1	GQ922175	H1	GQ922170
WP110728	M	H3	GQ922135	H1	GQ922175	H1	GQ922170
WP110729	M	H10	GQ922142	NA		H1	GQ922170
WP110730	M	H12	GQ922144	H1	GQ922175	H1	GQ922170
V. kershawi		Vk1	GQ922169	NA		NA
J. villida		Jv1	GQ922168	NA		NA
